# Supplementary material for: On the Calculation of Fourier Integrals.
Source: MDPI journal article supplement (doi:10.3390/plants12030522), 1971-01-01
Supplement: s1 [file s1]

## Supporting information

*Capturing diversity in seed collections: an empirical study of two congeners with contrasting mating systems*

**Table S1.** Sample collection sites and details for (a) landscape-scale population genetics (Restore & Renew) sampling; (b) seed (progeny array) sampling.

(a)

| species               | site             | latitude | longitude | date       | n samples | type |
|-----------------------|------------------|----------|-----------|------------|-----------|------|
| <i>H. sericea</i>     | BlueMountainsNP  | -28.5569 | 153.418   | 17/10/2015 | 5         | leaf |
| <i>H. sericea</i>     | BrisbaneWatersNP | -33.682  | 151.1514  | 19/05/2015 | 6         | leaf |
| <i>H. sericea</i>     | S10              | -35.0225 | 150.4717  | 23/07/2016 | 6         | leaf |
| <i>H. sericea</i>     | S106             | -34.3251 | 150.4746  | 6/05/2016  | 6         | leaf |
| <i>H. sericea</i>     | S17              | -34.5213 | 150.2129  | 21/07/2016 | 6         | leaf |
| <i>H. sericea</i>     | S247             | -34.0105 | 151.2234  | 11/05/2016 | 6         | leaf |
| <i>H. sericea</i>     | S255             | -33.0066 | 151.4684  | 13/04/2017 | 6         | leaf |
| <i>H. sericea</i>     | S261             | -35.0412 | 150.1355  | 13/04/2017 | 6         | leaf |
| <i>H. sericea</i>     | S27              | -33.7839 | 150.6132  | 18/03/2016 | 6         | leaf |
| <i>H. sericea</i>     | S315             | -33.4152 | 151.004   | 9/05/2017  | 6         | leaf |
| <i>H. sericea</i>     | S324             | -33.9803 | 151.0084  | 10/11/2016 | 6         | leaf |
| <i>H. sericea</i>     | S37              | -33.3141 | 150.2451  | 17/09/2015 | 6         | leaf |
| <i>H. sericea</i>     | S402             | -32.7319 | 152.1305  | 23/05/2017 | 6         | leaf |
| <i>H. sericea</i>     | S41              | -32.8967 | 150.7616  | 16/08/2016 | 6         | leaf |
| <i>H. sericea</i>     | S453             | -33.4848 | 151.1868  | 26/05/2017 | 6         | leaf |
| <i>H. sericea</i>     | S46              | -33.1449 | 151.0966  | 11/11/2015 | 6         | leaf |
| <i>H. sericea</i>     | S486             | -33.5241 | 150.5658  | 24/05/2017 | 6         | leaf |
| <i>H. sericea</i>     | S50              | -33.6836 | 150.7614  | 18/08/2016 | 6         | leaf |
| <i>H. sericea</i>     | S546             | -29.9343 | 152.989   | 22/06/2017 | 6         | leaf |
| <i>H. sericea</i>     | S56              | -34.1382 | 150.9983  | 31/08/2016 | 5         | leaf |
| <i>H. sericea</i>     | S57              | -33.4765 | 150.7773  | 30/12/2016 | 5         | leaf |
| <i>H. sericea</i>     | S585             | -35.1281 | 150.0123  | 10/07/2017 | 6         | leaf |
| <i>H. sericea</i>     | S612             | -33.6635 | 150.6113  | 13/07/2017 | 6         | leaf |
| <i>H. sericea</i>     | S67              | -32.8831 | 151.4473  | 21/04/2016 | 5         | leaf |
| <i>H. sericea</i>     | S68              | -34.3519 | 150.631   | 8/09/2016  | 6         | leaf |
| <i>H. sericea</i>     | S73              | -33.7848 | 150.3967  | 21/04/2016 | 6         | leaf |
| <i>H. teretifolia</i> | BlueMountainsNP  | -33.6737 | 151.2086  | 11/06/2015 | 6         | leaf |
| <i>H. teretifolia</i> | BrisbaneWatersNP | -33.6717 | 151.1371  | 19/05/2015 | 6         | leaf |
| <i>H. teretifolia</i> | HeathcoteNP      | -33.5516 | 151.2954  | 18/03/2016 | 6         | leaf |
| <i>H. teretifolia</i> | DuffysForest     | -33.6737 | 151.2086  | 20/05/2016 | 5         | leaf |
| <i>H. teretifolia</i> | JervisBayNP      | -32.7454 | 152.1131  | 12/04/2016 | 6         | leaf |
| <i>H. teretifolia</i> | HeathcoteNP      | -33.8168 | 151.3005  | 14/10/2015 | 7         | leaf |
| <i>H. teretifolia</i> | RoyalNP          | -35.1072 | 150.6784  | 25/07/2015 | 6         | leaf |
| <i>H. teretifolia</i> | S156             | -35.1123 | 150.3161  | 15/03/2017 | 6         | leaf |
| <i>H. teretifolia</i> | S162             | -32.1167 | 152.4441  | 16/03/2017 | 6         | leaf |
| <i>H. teretifolia</i> | S177             | -33.6244 | 151.2606  | 28/03/2017 | 6         | leaf |
| <i>H. teretifolia</i> | S18              | -32.5015 | 152.2875  | 21/11/2016 | 6         | leaf |

## Supporting information

*Capturing diversity in seed collections: an empirical study of two congeners with contrasting mating systems*

|                       |      |          |          |            |   |      |
|-----------------------|------|----------|----------|------------|---|------|
| <i>H. teretifolia</i> | S19  | -33.5406 | 151.2825 | 3/09/2015  | 6 | leaf |
| <i>H. teretifolia</i> | S21  | -34.1693 | 150.9951 | 14/03/2016 | 6 | leaf |
| <i>H. teretifolia</i> | S31  | -31.3136 | 152.8723 | 12/04/2016 | 6 | leaf |
| <i>H. teretifolia</i> | S324 | -31.7608 | 152.745  | 10/11/2016 | 5 | leaf |
| <i>H. teretifolia</i> | S34  | -34.1155 | 150.9491 | 13/04/2016 | 6 | leaf |
| <i>H. teretifolia</i> | S43  | -33.7953 | 150.4044 | 19/04/2016 | 6 | leaf |
| <i>H. teretifolia</i> | S47  | -33.6556 | 151.2568 | 18/08/2016 | 6 | leaf |
| <i>H. teretifolia</i> | S55  | -33.5879 | 150.2676 | 20/04/2016 | 6 | leaf |
| <i>H. teretifolia</i> | S56  | -35.0225 | 150.4717 | 31/08/2016 | 5 | leaf |
| <i>H. teretifolia</i> | S588 | -33.6078 | 150.3253 | 10/07/2017 | 6 | leaf |
| <i>H. teretifolia</i> | S591 | -34.6731 | 150.7168 | 10/07/2017 | 6 | leaf |
| <i>H. teretifolia</i> | S594 | -34.138  | 150.9971 | 10/07/2017 | 6 | leaf |
| <i>H. teretifolia</i> | S60  | -33.165  | 151.5796 | 4/01/2017  | 6 | leaf |
| <i>H. teretifolia</i> | S600 | -34.1404 | 151.1156 | 11/07/2017 | 6 | leaf |
| <i>H. teretifolia</i> | S603 | -34.2048 | 150.8464 | 11/07/2017 | 6 | leaf |
| <i>H. teretifolia</i> | S73  | -33.5768 | 150.3634 | 21/04/2016 | 6 | leaf |
| <i>H. teretifolia</i> | S8   | -33.4472 | 151.2139 | 28/06/2016 | 6 | leaf |

(b)

| species               | site | latitude | longitude | date       | n samples | type       |
|-----------------------|------|----------|-----------|------------|-----------|------------|
| <i>H. sericea</i>     | BV   | -33.6461 | 151.1045  | 28/10/2018 | 10        | leaf, seed |
| <i>H. sericea</i>     | CR   | -34.9776 | 150.738   | 13/12/2018 | 10        | leaf, seed |
| <i>H. sericea</i>     | KL   | -34.0124 | 151.2244  | 12/10/2018 | 10        | leaf, seed |
| <i>H. sericea</i>     | MO   | -33.4869 | 151.1873  | 7/12/2018  | 10        | leaf, seed |
| <i>H. sericea</i>     | PT   | -32.8967 | 150.7613  | 29/11/2018 | 10        | leaf, seed |
| <i>H. sericea</i>     | SP   | -33.6861 | 150.5779  | 28/10/2018 | 11        | leaf, seed |
| <i>H. teretifolia</i> | BV   | -33.6438 | 151.1141  | 28/10/2018 | 10        | leaf, seed |
| <i>H. teretifolia</i> | CR   | -35.0015 | 150.7927  | 13/12/2018 | 10        | leaf, seed |
| <i>H. teretifolia</i> | KL   | -34.0131 | 151.2251  | 12/10/2018 | 10        | leaf, seed |
| <i>H. teretifolia</i> | MB   | -33.5782 | 150.3635  | 26/10/2018 | 10        | leaf, seed |
| <i>H. teretifolia</i> | MU   | -33.1649 | 151.5792  | 7/12/2018  | 10        | leaf, seed |
| <i>H. teretifolia</i> | RN   | -34.1137 | 151.0677  | 22/11/2018 | 10        | leaf, seed |
| <i>H. teretifolia</i> | VC   | -33.5879 | 150.2677  | 26/10/2018 | 10        | leaf, seed |

## Supporting information

*Capturing diversity in seed collections: an empirical study of two congeners with contrasting mating systems*

**Table S2.** Seed (progeny array) details and germination results.

| species           | site | mat. line | n sown | n germ. | % germ. | n sequenced |
|-------------------|------|-----------|--------|---------|---------|-------------|
| <i>H. sericea</i> | BV   | 1         | 15     | 15      | 100     | 3           |
| <i>H. sericea</i> | BV   | 2         | 18     | 15      | 83      | 3           |
| <i>H. sericea</i> | BV   | 3         | 10     | 10      | 100     | 3           |
| <i>H. sericea</i> | BV   | 4         | 18     | 16      | 89      | 12          |
| <i>H. sericea</i> | BV   | 5         | 11     | 11      | 100     | 5           |
| <i>H. sericea</i> | BV   | 6         | 26     | 21      | 81      | 10          |
| <i>H. sericea</i> | BV   | 7         | 6      | 6       | 100     | 1           |
| <i>H. sericea</i> | BV   | 8         | 12     | 12      | 100     | 3           |
| <i>H. sericea</i> | BV   | 9         | 15     | 15      | 100     | 10          |
| <i>H. sericea</i> | BV   | 10        | 12     | 12      | 100     | 3           |
| <i>H. sericea</i> | CR   | 1         | 20     | 18      | 90      | 3           |
| <i>H. sericea</i> | CR   | 2         | 16     | 16      | 100     | 3           |
| <i>H. sericea</i> | CR   | 3         | 24     | 24      | 100     | 3           |
| <i>H. sericea</i> | CR   | 4         | 26     | 26      | 100     | 12          |
| <i>H. sericea</i> | CR   | 5         | 26     | 24      | 92      | 3           |
| <i>H. sericea</i> | CR   | 6         | 22     | 19      | 86      | 3           |
| <i>H. sericea</i> | CR   | 7         | 22     | 22      | 100     | 3           |
| <i>H. sericea</i> | CR   | 8         | 24     | 24      | 100     | 10          |
| <i>H. sericea</i> | CR   | 9         | 22     | 22      | 100     | 3           |
| <i>H. sericea</i> | CR   | 10        | 13     | 12      | 92      | 10          |
| <i>H. sericea</i> | KL   | 1         | 20     | 20      | 100     | 10          |
| <i>H. sericea</i> | KL   | 2         | 20     | 19      | 95      | 3           |
| <i>H. sericea</i> | KL   | 3         | 20     | 20      | 100     | 9           |
| <i>H. sericea</i> | KL   | 4         | 17     | 17      | 100     | 3           |
| <i>H. sericea</i> | KL   | 5         | 19     | 12      | 63      | 0           |
| <i>H. sericea</i> | KL   | 6         | 19     | 19      | 100     | 3           |
| <i>H. sericea</i> | KL   | 7         | 20     | 20      | 100     | 3           |
| <i>H. sericea</i> | KL   | 8         | 19     | 19      | 100     | 3           |
| <i>H. sericea</i> | KL   | 9         | 20     | 20      | 100     | 10          |
| <i>H. sericea</i> | KL   | 10        | 20     | 20      | 100     | 3           |
| <i>H. sericea</i> | MO   | 1         | 24     | 23      | 96      | 10          |
| <i>H. sericea</i> | MO   | 2         | 24     | 24      | 100     | 9           |
| <i>H. sericea</i> | MO   | 3         | 12     | 11      | 92      | 4           |
| <i>H. sericea</i> | MO   | 4         | 6      | 5       | 83      | 2           |
| <i>H. sericea</i> | MO   | 5         | 6      | 6       | 100     | 3           |
| <i>H. sericea</i> | MO   | 6         | 18     | 17      | 94      | 3           |
| <i>H. sericea</i> | MO   | 7         | 8      | 8       | 100     | 3           |
| <i>H. sericea</i> | MO   | 8         | 12     | 12      | 100     | 3           |
| <i>H. sericea</i> | MO   | 9         | 16     | 14      | 88      | 9           |
| <i>H. sericea</i> | MO   | 10        | 8      | 7       | 88      | 3           |
| <i>H. sericea</i> | PT   | 1         | 24     | 24      | 100     | 10          |
| <i>H. sericea</i> | PT   | 2         | 24     | 23      | 96      | 12          |
| <i>H. sericea</i> | PT   | 3         | 24     | 18      | 75      | 3           |
| <i>H. sericea</i> | PT   | 4         | 24     | 17      | 71      | 3           |
| <i>H. sericea</i> | PT   | 5         | 22     | 18      | 82      | 3           |
| <i>H. sericea</i> | PT   | 6         | 24     | 24      | 100     | 10          |

## Supporting information

*Capturing diversity in seed collections: an empirical study of two congeners with contrasting mating systems*

|                       |    |    |    |    |     |    |
|-----------------------|----|----|----|----|-----|----|
| <i>H. sericea</i>     | PT | 7  | 21 | 17 | 81  | 3  |
| <i>H. sericea</i>     | PT | 8  | 18 | 17 | 94  | 3  |
| <i>H. sericea</i>     | PT | 9  | 23 | 18 | 78  | 3  |
| <i>H. sericea</i>     | PT | 10 | 22 | 19 | 86  | 3  |
| <i>H. sericea</i>     | SP | 1  | 18 | 13 | 72  | 10 |
| <i>H. sericea</i>     | SP | 2  | 10 | 10 | 100 | 3  |
| <i>H. sericea</i>     | SP | 3  | 20 | 20 | 100 | 12 |
| <i>H. sericea</i>     | SP | 4  | 12 | 11 | 92  | 3  |
| <i>H. sericea</i>     | SP | 5  | 8  | 8  | 100 | 3  |
| <i>H. sericea</i>     | SP | 6  | 6  | 6  | 100 | 3  |
| <i>H. sericea</i>     | SP | 7  | 6  | 6  | 100 | 3  |
| <i>H. sericea</i>     | SP | 8  | 17 | 13 | 76  | 10 |
| <i>H. sericea</i>     | SP | 9  | 12 | 12 | 100 | 3  |
| <i>H. sericea</i>     | SP | 10 | 10 | 10 | 100 | 3  |
| <i>H. sericea</i>     | SP | 11 | 12 | 12 | 100 | 3  |
| <i>H. teretifolia</i> | BV | 1  | 24 | 20 | 83  | 10 |
| <i>H. teretifolia</i> | BV | 2  | 19 | 11 | 58  | 1  |
| <i>H. teretifolia</i> | BV | 3  | 15 | 7  | 47  | 3  |
| <i>H. teretifolia</i> | BV | 4  | 14 | 7  | 50  | 3  |
| <i>H. teretifolia</i> | BV | 5  | 7  | 1  | 14  | 0  |
| <i>H. teretifolia</i> | BV | 6  | 24 | 11 | 46  | 6  |
| <i>H. teretifolia</i> | BV | 7  | 24 | 9  | 38  | 3  |
| <i>H. teretifolia</i> | BV | 8  | 14 | 4  | 29  | 3  |
| <i>H. teretifolia</i> | BV | 9  | 4  | 2  | 50  | 2  |
| <i>H. teretifolia</i> | BV | 10 | 24 | 20 | 83  | 9  |
| <i>H. teretifolia</i> | CR | 1  | 24 | 23 | 96  | 9  |
| <i>H. teretifolia</i> | CR | 2  | 24 | 19 | 79  | 0  |
| <i>H. teretifolia</i> | CR | 3  | 25 | 25 | 100 | 3  |
| <i>H. teretifolia</i> | CR | 4  | 21 | 17 | 81  | 3  |
| <i>H. teretifolia</i> | CR | 5  | 24 | 24 | 100 | 10 |
| <i>H. teretifolia</i> | CR | 6  | 28 | 22 | 79  | 3  |
| <i>H. teretifolia</i> | CR | 7  | 24 | 13 | 54  | 3  |
| <i>H. teretifolia</i> | CR | 8  | 25 | 23 | 92  | 10 |
| <i>H. teretifolia</i> | CR | 9  | 28 | 27 | 96  | 3  |
| <i>H. teretifolia</i> | CR | 10 | 28 | 25 | 89  | 3  |
| <i>H. teretifolia</i> | KL | 1  | 6  | 5  | 83  | 2  |
| <i>H. teretifolia</i> | KL | 2  | 9  | 8  | 89  | 3  |
| <i>H. teretifolia</i> | KL | 3  | 14 | 4  | 29  | 3  |
| <i>H. teretifolia</i> | KL | 4  | 24 | 16 | 67  | 10 |
| <i>H. teretifolia</i> | KL | 5  | 16 | 15 | 94  | 9  |
| <i>H. teretifolia</i> | KL | 6  | 18 | 9  | 50  | 3  |
| <i>H. teretifolia</i> | KL | 7  | 24 | 21 | 88  | 10 |
| <i>H. teretifolia</i> | KL | 8  | 21 | 11 | 52  | 3  |
| <i>H. teretifolia</i> | KL | 9  | 3  | 2  | 67  | 3  |
| <i>H. teretifolia</i> | KL | 10 | 17 | 7  | 41  | 3  |
| <i>H. teretifolia</i> | MB | 1  | 25 | 14 | 56  | 9  |
| <i>H. teretifolia</i> | MB | 2  | 12 | 2  | 17  | 1  |
| <i>H. teretifolia</i> | MB | 3  | 15 | 4  | 27  | 3  |
| <i>H. teretifolia</i> | MB | 4  | 24 | 21 | 88  | 10 |

## Supporting information

*Capturing diversity in seed collections: an empirical study of two congeners with contrasting mating systems*

|                       |    |    |    |    |     |    |
|-----------------------|----|----|----|----|-----|----|
| <i>H. teretifolia</i> | MB | 5  | 16 | 16 | 100 | 3  |
| <i>H. teretifolia</i> | MB | 6  | 23 | 14 | 61  | 3  |
| <i>H. teretifolia</i> | MB | 7  | 18 | 10 | 56  | 3  |
| <i>H. teretifolia</i> | MB | 8  | 10 | 8  | 80  | 3  |
| <i>H. teretifolia</i> | MB | 9  | 24 | 23 | 96  | 10 |
| <i>H. teretifolia</i> | MB | 10 | 25 | 15 | 60  | 3  |
| <i>H. teretifolia</i> | MU | 1  | 22 | 3  | 14  | 3  |
| <i>H. teretifolia</i> | MU | 2  | 24 | 7  | 29  | 5  |
| <i>H. teretifolia</i> | MU | 3  | 25 | 5  | 20  | 6  |
| <i>H. teretifolia</i> | MU | 4  | 19 | 4  | 21  | 4  |
| <i>H. teretifolia</i> | MU | 5  | 22 | 5  | 23  | 3  |
| <i>H. teretifolia</i> | MU | 6  | 24 | 1  | 4   | 1  |
| <i>H. teretifolia</i> | MU | 7  | 16 | 5  | 31  | 5  |
| <i>H. teretifolia</i> | MU | 8  | 24 | 4  | 17  | 5  |
| <i>H. teretifolia</i> | MU | 9  | 23 | 4  | 17  | 3  |
| <i>H. teretifolia</i> | MU | 10 | 21 | 3  | 14  | 5  |
| <i>H. teretifolia</i> | RN | 1  | 20 | 5  | 25  | 3  |
| <i>H. teretifolia</i> | RN | 2  | 26 | 20 | 77  | 3  |
| <i>H. teretifolia</i> | RN | 3  | 24 | 18 | 75  | 10 |
| <i>H. teretifolia</i> | RN | 4  | 24 | 22 | 92  | 3  |
| <i>H. teretifolia</i> | RN | 5  | 28 | 23 | 82  | 10 |
| <i>H. teretifolia</i> | RN | 6  | 24 | 17 | 71  | 3  |
| <i>H. teretifolia</i> | RN | 7  | 23 | 12 | 52  | 3  |
| <i>H. teretifolia</i> | RN | 8  | 24 | 24 | 100 | 4  |
| <i>H. teretifolia</i> | RN | 9  | 24 | 4  | 17  | 2  |
| <i>H. teretifolia</i> | RN | 10 | 18 | 17 | 94  | 10 |
| <i>H. teretifolia</i> | VC | 1  | 16 | 4  | 25  | 3  |
| <i>H. teretifolia</i> | VC | 2  | 24 | 1  | 4   | 0  |
| <i>H. teretifolia</i> | VC | 3  | 16 | 1  | 6   | 0  |
| <i>H. teretifolia</i> | VC | 4  | 25 | 0  | 0   | 0  |
| <i>H. teretifolia</i> | VC | 5  | 18 | 7  | 39  | 7  |
| <i>H. teretifolia</i> | VC | 6  | 17 | 8  | 47  | 8  |
| <i>H. teretifolia</i> | VC | 7  | 13 | 5  | 38  | 2  |
| <i>H. teretifolia</i> | VC | 8  | 16 | 3  | 19  | 2  |
| <i>H. teretifolia</i> | VC | 9  | 24 | 5  | 21  | 4  |
| <i>H. teretifolia</i> | VC | 10 | 13 | 1  | 8   | 1  |

## Supporting information

*Capturing diversity in seed collections: an empirical study of two congeners with contrasting mating systems*

**Table S3.** Estimates of genetic diversity for seed sampling sites (per-site  $H_o$ ,  $H_e$ , FIS, relatedness, average genetic distance from mother plants; average genetic distance from all individuals).

| species               | site | $H_o$ | $H_e$ | FIS    | average pairwise relatedness | average pairwise Euclidean distance (mums) | average pairwise Euclidean distance (all) |
|-----------------------|------|-------|-------|--------|------------------------------|--------------------------------------------|-------------------------------------------|
| <i>H. sericea</i>     | BV   | 0.094 | 0.193 | 0.424  | 0.059                        | 88.249                                     | 85.790                                    |
| <i>H. sericea</i>     | CR   | 0.026 | 0.103 | 0.699  | 0.157                        | 62.173                                     | 48.169                                    |
| <i>H. sericea</i>     | KL   | 0.021 | 0.143 | 0.823  | 0.128                        | 72.603                                     | 68.620                                    |
| <i>H. sericea</i>     | MO   | 0.057 | 0.1   | 0.365  | 0.068                        | 59.600                                     | 56.775                                    |
| <i>H. sericea</i>     | PT   | 0.018 | 0.013 | -0.149 | 0.381                        | 15.693                                     | 15.356                                    |
| <i>H. sericea</i>     | SP   | 0.015 | 0.094 | 0.84   | 0.265                        | 54.486                                     | 63.033                                    |
| <i>H. teretifolia</i> | BV   | 0.120 | 0.191 | 0.311  | 0.052                        | 99.253                                     | 93.421                                    |
| <i>H. teretifolia</i> | CR   | 0.081 | 0.173 | 0.436  | 0.073                        | 98.387                                     | 93.814                                    |
| <i>H. teretifolia</i> | KL   | 0.139 | 0.195 | 0.228  | 0.056                        | 95.900                                     | 92.135                                    |
| <i>H. teretifolia</i> | MB   | 0.134 | 0.191 | 0.241  | 0.056                        | 95.920                                     | 96.160                                    |
| <i>H. teretifolia</i> | MU   | 0.135 | 0.142 | 0.036  | 0.053                        | 72.956                                     | 75.511                                    |
| <i>H. teretifolia</i> | RN   | 0.175 | 0.201 | 0.100  | 0.057                        | 93.658                                     | 98.384                                    |
| <i>H. teretifolia</i> | VC   | 0.102 | 0.160 | 0.290  | 0.071                        | 85.262                                     | 85.624                                    |

## Supporting information

*Capturing diversity in seed collections: an empirical study of two congeners with contrasting mating systems*

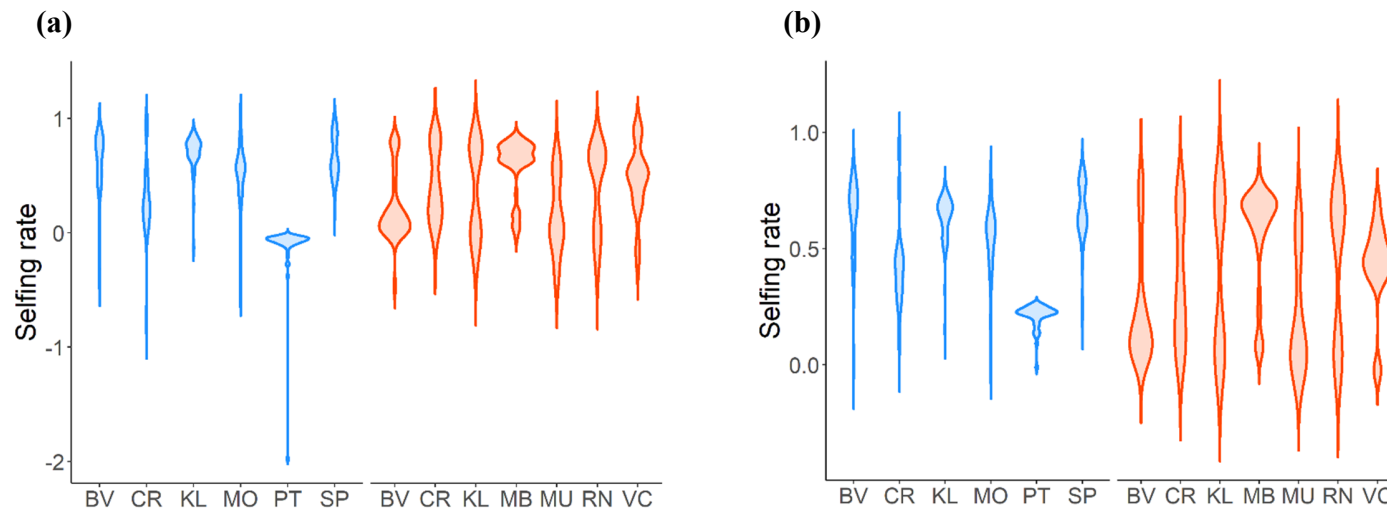

**Figure S1.** Violin plots (Gaussian kernel density estimates) of individual progeny selfing rates inferred per site using (a) MME and (b) CNN approaches for *H. sericea* (blue) and *H. teretifolia* (orange). Estimates for all sites are shown, including outlier estimates from site PT at which all mother plants were highly genetically homogeneous.

## Supporting information

*Capturing diversity in seed collections: an empirical study of two congeners with contrasting mating systems*

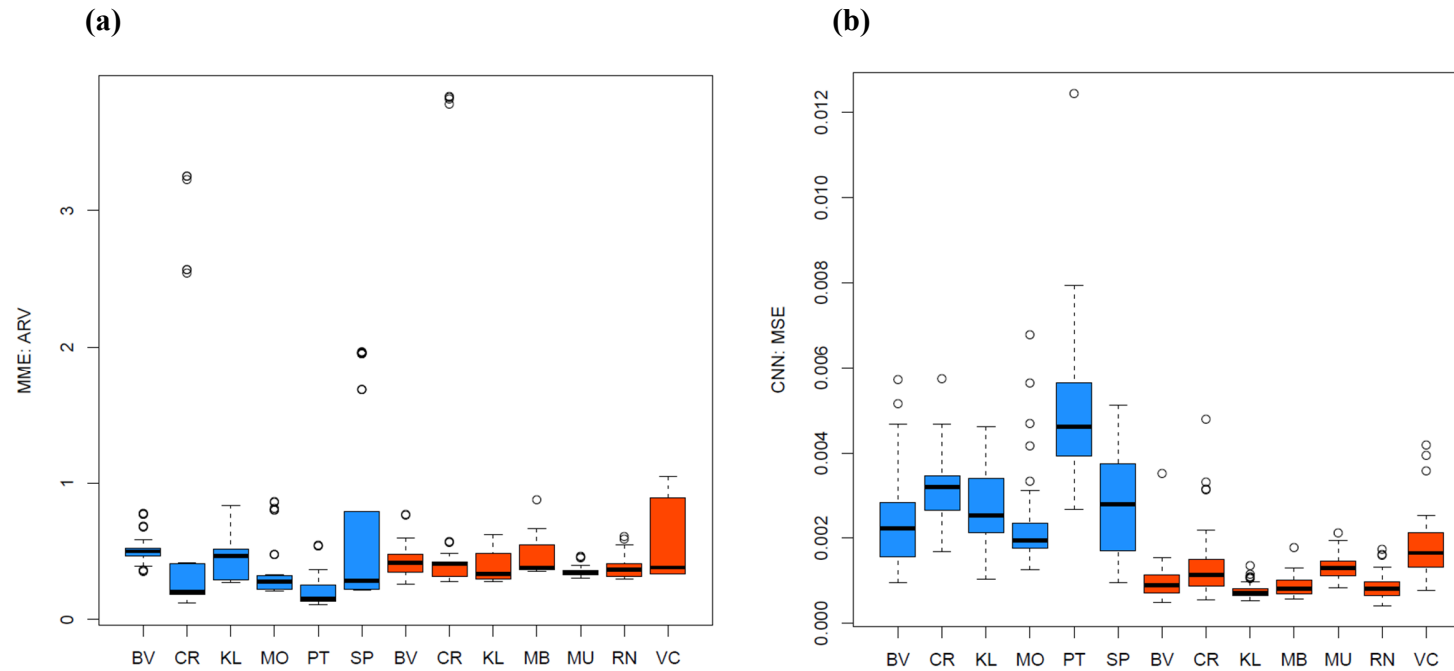

**Figure S2.** Measures of (a) average reciprocal variance among loci calculated as part of MME inference of selfing rate, and (b) mean standard error from CNN estimation of selfing rate among progeny at each site in *H. sericea* (blue) and *H. teretifolia* (orange). Less informative data for estimation of selfing rates are expected to result in lower ARV and higher MSE values relative to more informative data. Thus, less confidence might be warranted in estimates with relatively low ARV and/or relatively high MSE.



## Supporting information

*Capturing diversity in seed collections: an empirical study of two congeners with contrasting mating systems*

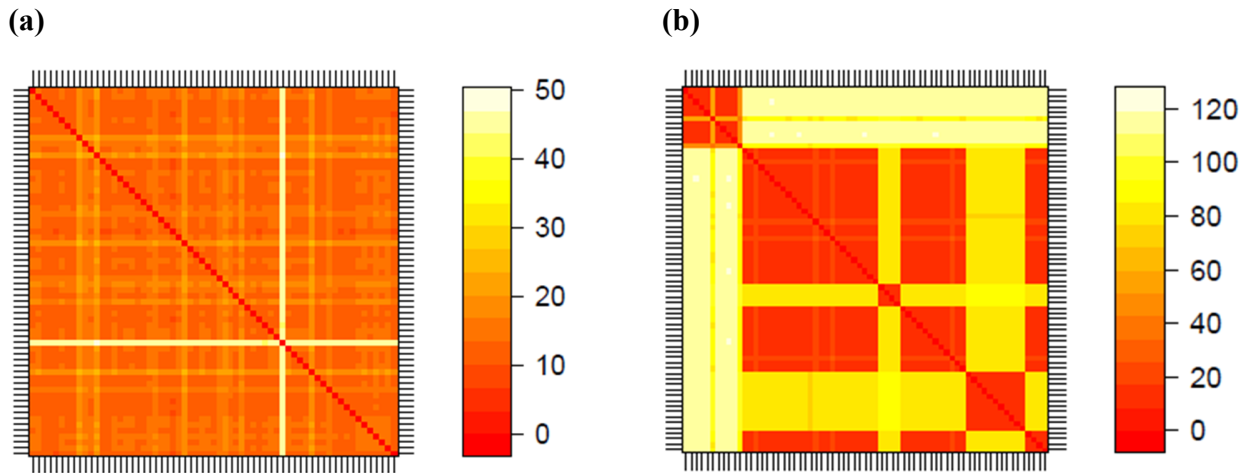

**Figure S3.** Heatmaps of pairwise Euclidean distance matrices among *H. sericea* individuals originating from (a) site PT and (b) site SP (at which observed heterozygosity is similar to PT). Matrices are ordered by maternal line (mother followed by offspring). High similarity among all individuals across maternal lines at site PT is indicated by near-uniformly low pairwise genetic distance (orange-red tones). In contrast, four distinct groups of similar individuals are discernible at site SP, corresponding to maternal lines (with the largest of these groups comprising 8 of the 11 maternal lines sampled at this site).

## Supporting information

*Capturing diversity in seed collections: an empirical study of two congeners with contrasting mating systems*

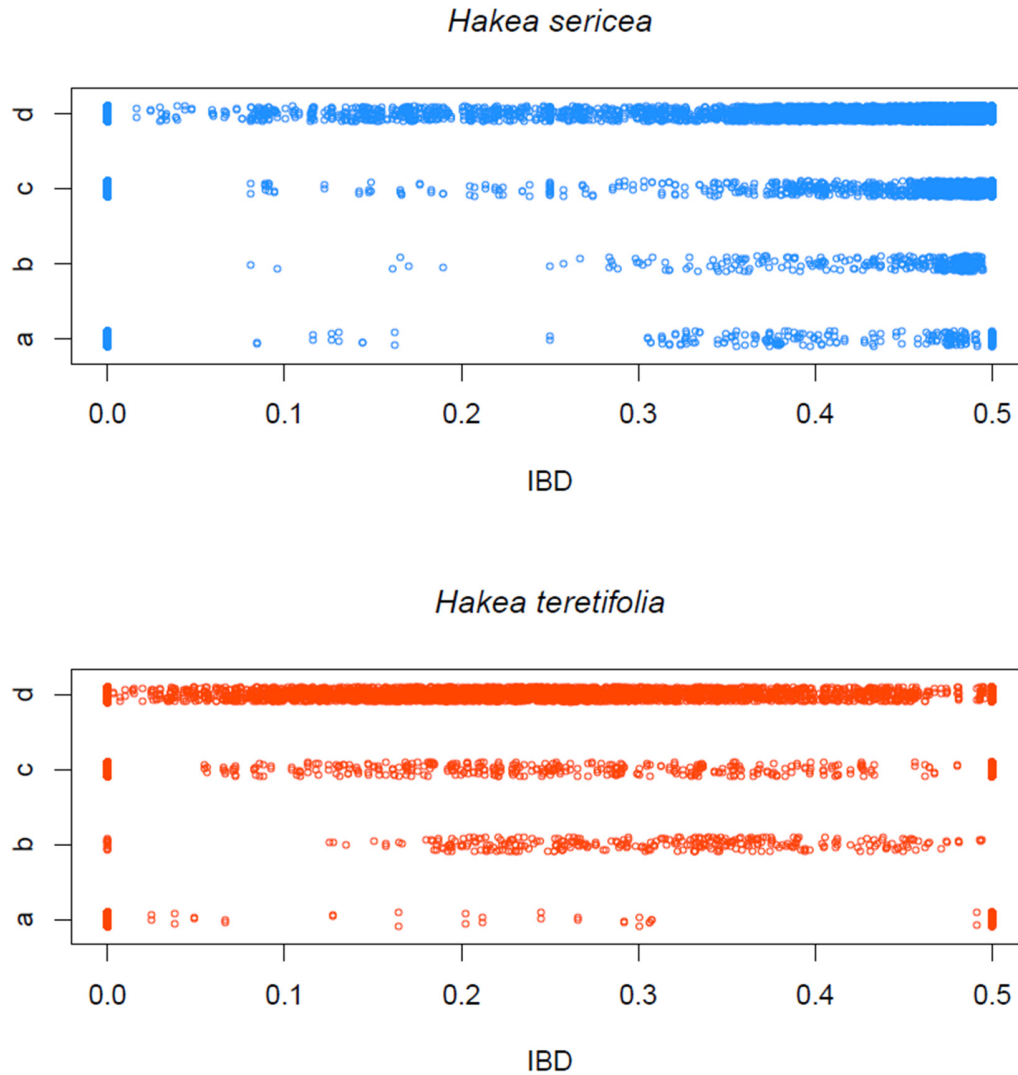

**Figure S4.** Stripcharts plotting pairwise kinship estimates among (a) mothers within populations, (b) mothers and offspring, (c) siblings within populations, (d) all individuals within populations. IBD= identity by descent. On average, pairwise kinship coefficients among mothers within populations were significantly higher in *H. sericea* (0.18, vs. 0.059 in *H. teretifolia*,  $p = 6.2 \times 10^{-27}$ ), as were parent-progeny kinship coefficients (*H. sericea*: 0.44, *H. teretifolia*: 0.30,  $p = 2.6 \times 10^{-58}$ ), and kinship coefficients among siblings (*H. sericea*: 0.27, *H. teretifolia*: 0.12,  $p = 8.0 \times 10^{-69}$ ).

## Supporting information

*Capturing diversity in seed collections: an empirical study of two congeners with contrasting mating systems*

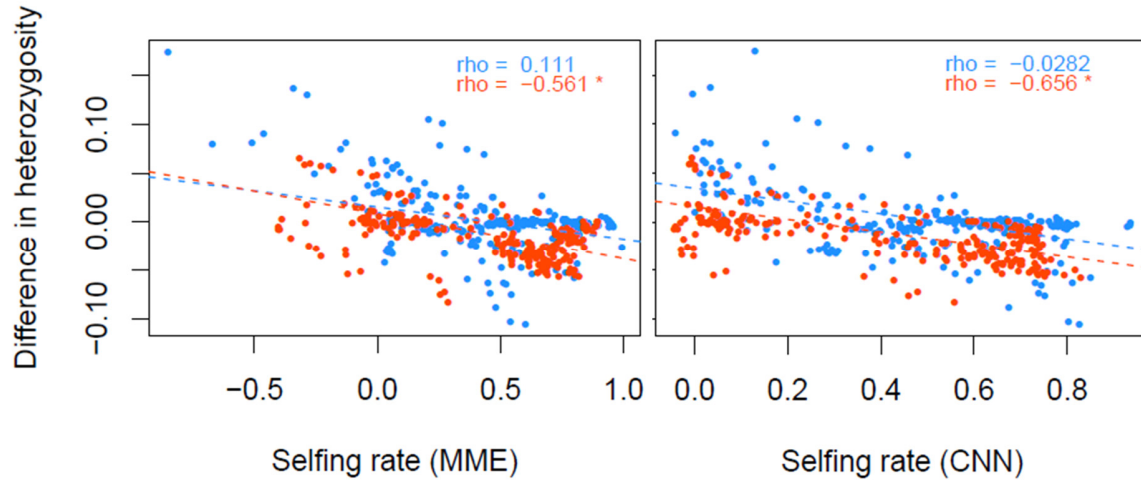

**Figure S5.** Difference in proportion of heterozygous loci between individual seedlings and their mothers, plotted against each seedling's estimated selfing rate (*H. sericea*: blue; *H. teretifolia*: orange). Shown for each species: linear regression (dashed) lines; Spearman's correlation coefficient (rho), asterisks denoting significant correlation ( $p < 0.05$ ).

## Supporting information

*Capturing diversity in seed collections: an empirical study of two congeners with contrasting mating systems*

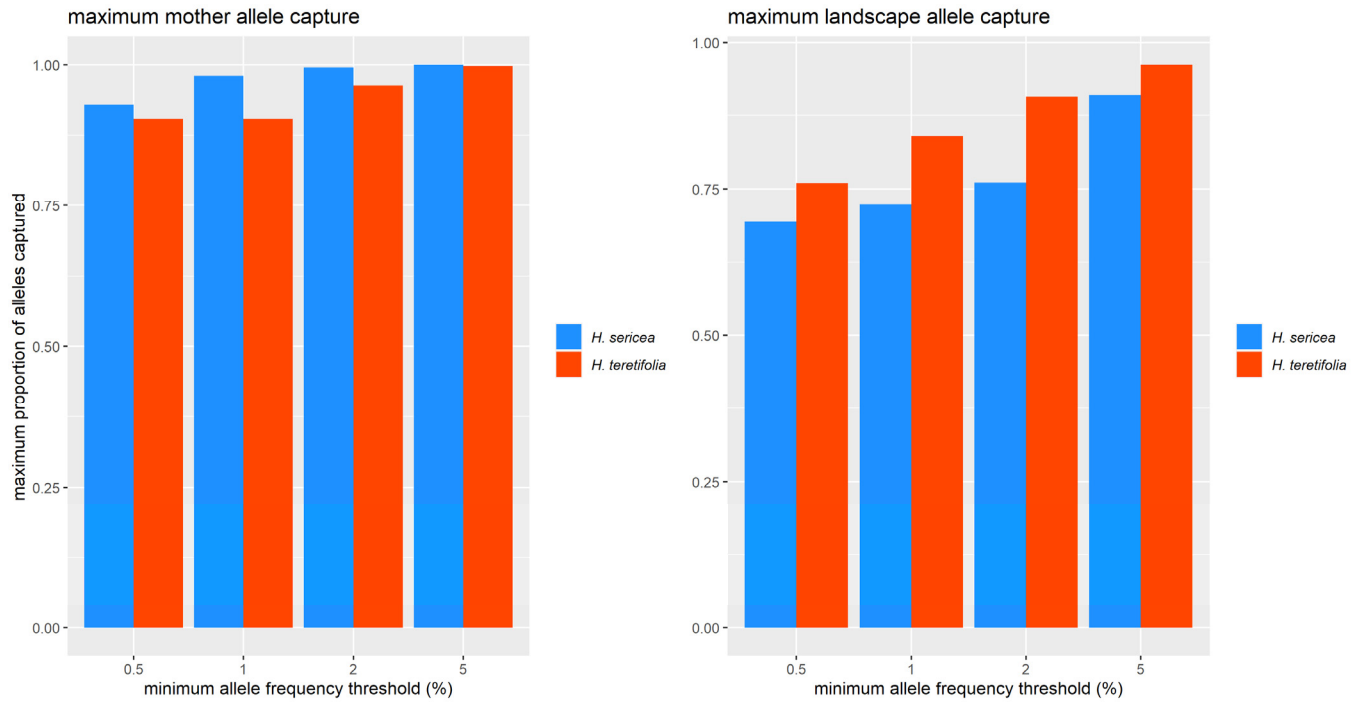

**Figure S6.** Maximum proportions of alleles captured by resampling seedlings (8 maternal lines among all seed sampling sites), for (a) alleles present in the mother plants at seed sampling sites, and (b) alleles present in all adult plants including the landscape-scale sampling sites. Maximum allele capture is shown for alleles present in each data set at four different frequencies (i.e., allele frequency  $\geq 0.5\%$ , 1%, 2%, and 5%).
